# Supplementary material for: A Computational–Experimental Investigation of the Molecular Mechanism of Interleukin-6-Piperine Interaction
Source: MDPI journal article supplement (doi:10.3390/ijms23147994), 2022-07-20
Supplement: s1 [file s1]

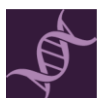

Supplementary material

# A Computational–Experimental Investigation of the Molecular Mechanism of Interleukin-6–Piperine Interaction

Ana Paula Ribeiro Povinelli <sup>1</sup>, Gabriel Zazeri <sup>1,\*</sup>, Alan M. Jones <sup>2</sup>  
and Marinônio Lopes Cornélio <sup>3,\*</sup>

<sup>1</sup> Federal Institute of Education, Science and Technology of Mato Grosso, Campo Novo do Parecis, 78360-000, Brazil; ana.povinelli@colaborador.ifmt.edu.br

<sup>2</sup> School of Pharmacy, Institute of Clinical Sciences, College of Medical and Dental Sciences, University of Birmingham, Edgbaston, Birmingham B15 2TT, UK; a.m.jones.2@bham.ac.uk

<sup>3</sup> Departamento de Física, Instituto de Biociências, Letras e Ciências Exatas (IBILCE), UNESP, Rua Cristovão Colombo 2265, São José do Rio Preto 15054-000, Brazil

\* Correspondence: gabriel.zazeri@colaborador.ifmt.edu.br (G.Z.) ; m.cornelio@unesp.br (M.L.C.)

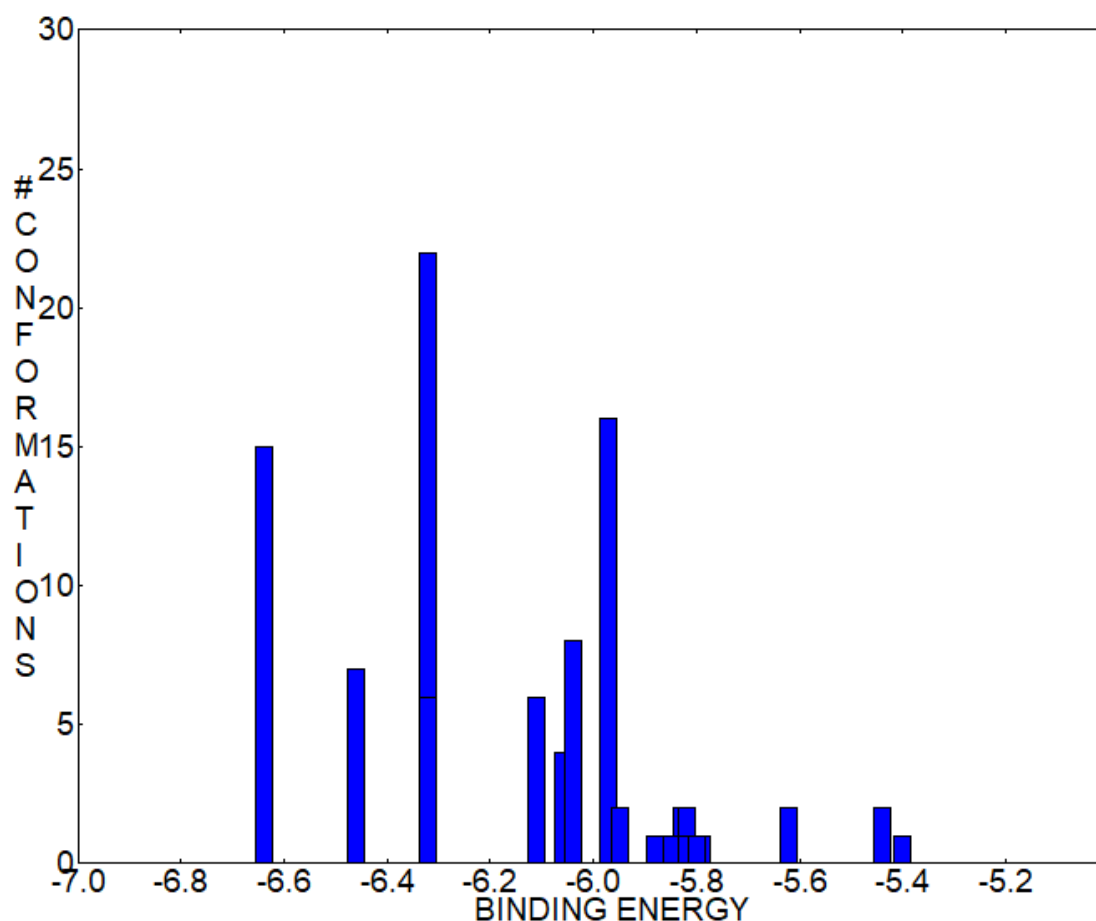

Figure S1: Molecular docking clusters with their respective energy scores

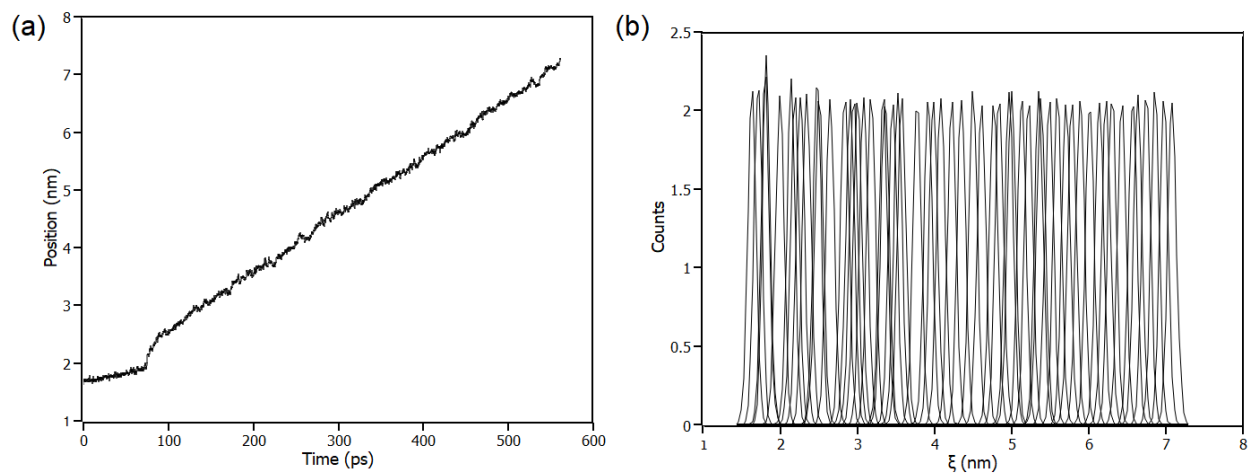

**Figure S2:** (a) Pulling profile during the pulling simulation. Y-axis is the value of reaction coordinate ( $\xi$ ) and x-axis is the time of simulation. (b) Configuration histograms of the pulling in z-axis with the windows distance = 0.1 nm.

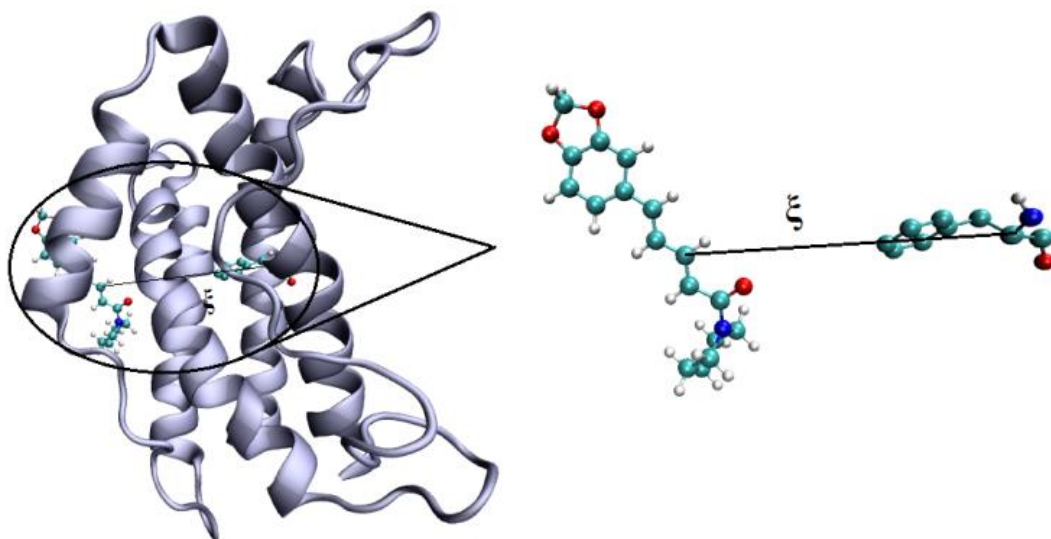

**Figure S3:** The atoms picked to define the reaction coordinate ( $\xi$ ) in umbrella sampling calculations. Zoomed in view of piperine and Phe171.

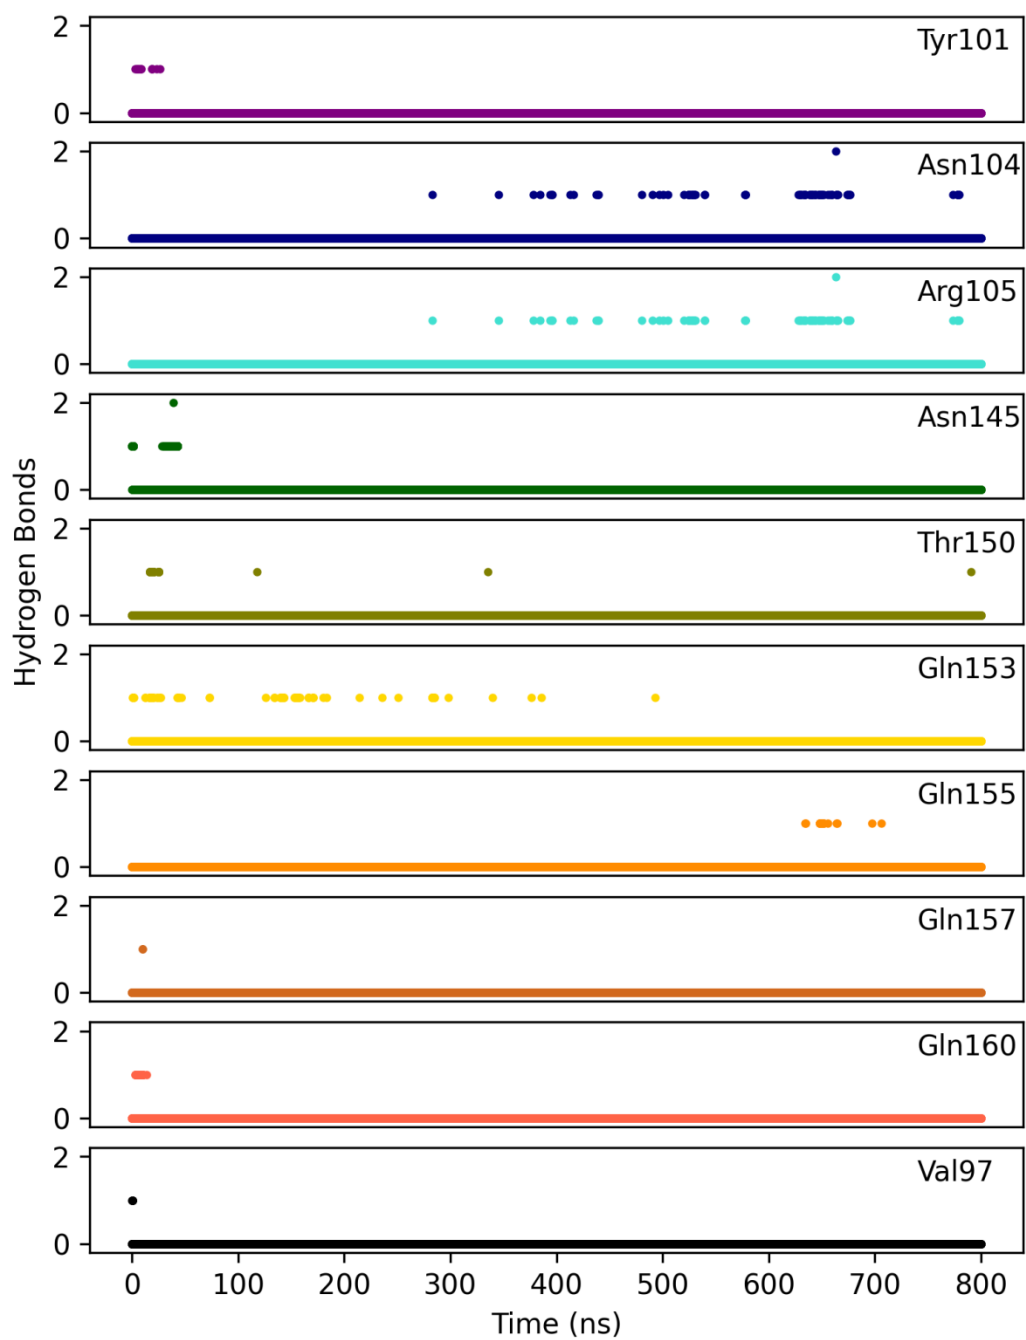

**Figure S4:** Hydrogen bonds performed during 800 ns of simulation.

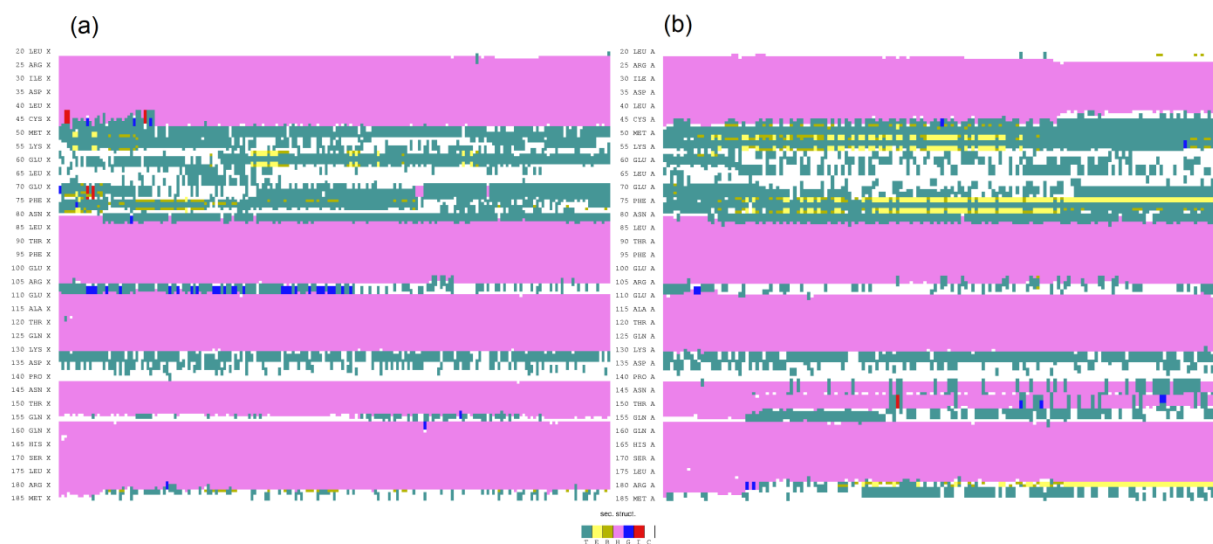

**Figure S5:** Global secondary structures of IL6 calculated during the molecular dynamics simulations in **(a)** the absence of piperine and **(b)** piperine inside the binding pocket.
